# Supplementary material
Source: MDPI journal article supplement (https://www.mdpi.com/2073-4352/12/1/9)
Supplement: s1 [file s1]

## SUPPLEMENTARY MATERIAL

### Exploring high-pressure transformations in low-Z (H<sub>2</sub>, Ne) hydrates at low temperatures

Paulo H. B. Brant Carvalho,<sup>1,\*</sup> Amber Mace,<sup>2</sup> Inna Martha Nangoi,<sup>3</sup> Alexandre A. Leitão<sup>3</sup>, Chris A. Tulk,<sup>4</sup>  
Jamie J. Molaison,<sup>4</sup> Ove Andersson,<sup>5</sup> Alexander P. Lyubartsev,<sup>1</sup> and Ulrich Häussermann<sup>1</sup>

<sup>1</sup>*Department of Materials and Environmental Chemistry, Stockholm University, SE-10691 Stockholm, Sweden*

<sup>2</sup>*Department of Chemistry – Ångström Laboratory, Uppsala University, SE-75236 Uppsala, Sweden*

<sup>3</sup>*Department of Chemistry, Federal University of Juiz de Fora, Juiz de Fora-MG, 36036-900, Brazil*

<sup>4</sup>*Neutron Scattering Division, Oak Ridge National Laboratory, Oak Ridge, Tennessee 37831, USA*

<sup>5</sup>*Department of Physics, Umeå University, SE-90187 Umeå, Sweden*

The main text is supported by an extensive collection of experiments, which are described in more details in this material. Three hydrogen hydrate (HH) sample batches (A, B and C) and one neon hydrate (NeH) sample (c) were prepared. Five HH (*a1*, *a2*, *a3*, *b*, *c\**) and one NeH experiments (*c*) were run on the SNAP high-pressure diffractometer at the Spallation Neutron Source in the Oak Ridge National Laboratory, USA.

#### A. IPTS-21975 (HH)

##### *a1.* Loading 1

Crystalline CS-II HH, 17.096(6) Å at 0.0(1) GPa, 95 K. Compressed at 90 bar<sup>1</sup>/h to 1.3(2) GPa, with phase transition (CS-II → C<sub>1</sub>) at 1.1(2) GPa. Upon recovery to atmospheric pressure at 95 K, C<sub>1</sub> transformed back to CS-II with no other phases observed in the diffractogram.

##### *a2.* Loading 2

Crystalline CS-II HH, 17.091(6) Å at 0.0(2) GPa, 95 K. Compressed at 50 bar/h to 4.8(4) GPa. CS-II → C<sub>1</sub> transition identified at 1.12(5) GPa. Partial decomposition of C<sub>1</sub> observed at 3.5(2) GPa, in which a mixture of C<sub>2</sub> and ice VIII' (~50% v/v C<sub>1</sub>, ~25% C<sub>2</sub>, ~25% ice VIII') formed. The sample was heated but the high-pressure caused parasitic peaks from the anvil materials to cover most of the diffractograms, and no further data could be identified.

##### *a3.* Loading 3

Crystalline CS-II HH, 17.104(8) Å at 0.0(5) GPa, 95 K. Compressed at 50 bar/h to 0.97(8) GPa. Heated at 10 K/h to 200 K. At 1.19(4) GPa, 165 K, CS-II fully transformed into C<sub>1</sub>. From 200 K, 1.56(5) GPa, the sample was continuously compressed to 7.8(2) GPa. Partial decomposition of C<sub>1</sub> observed at 3.6(1) GPa (composition could not be determined). Decompression at 200 K to atmospheric pressure, with recovery of empty C<sub>1</sub>, ice II.

#### B. IPTS-26245 (HH)

Crystalline CS-II HH, 17.094(1) Å at 0.1(1) GPa, 95 K. Compressed at 12.5 bar/h to 2.2(1) GPa. CS-II could be kept metastably to the highest pressure at 95 K, in which C<sub>1</sub> reflections started to peak. Heated directly to 200 K leading to the complete conversion of CS-II into C<sub>1</sub>. Compressed at 200 K, with partial decomposition of C<sub>1</sub> observed at 3.15(2) GPa. After further compressing at 200 K to 5.0(2) GPa (and after about 18 hours), the sample constituted 20% C<sub>1</sub> and 20% C<sub>2</sub>/60% ice VIII'. Cooled to 95 K and slowly decompressed (~100 bar/h). After complete removal of the load from the press the residual pressure remained at 0.1(2) GPa, where C<sub>1</sub> and ice VIII' could be identified. By completely opening the press and releasing all load from the sample gasket, the sample was recovered to atmospheric pressure. A mixture of ices II (~20%), I<sub>h</sub> (~60%) and I<sub>c</sub> (~20%) could be identified.

#### C. IPTS-24413

##### *c.* Loading 1 (NeH)

Crystalline CS-II NeH, 17.1161(8) Å at 0.09(5) GPa at 90 K. Compression to 3.0(1) GPa, with pressure-induced amorphization identified at 1.86(3) GPa. Recrystallization of the amorph a mixture of C<sub>2</sub>, ice VIII' and a small fraction of (metastable) ice I<sub>c</sub>.

##### *c\**. Loading 2 (HH)

Crystalline CS-II HH, 17.094(1) Å at 95 K.

---

<sup>1</sup> Oil pressure in the Paris-Edinburgh press hydraulic system.

**Table S1.** Refinement details from neutron powder diffraction data for C<sub>2</sub> Neon hydrate. Data collected at the high-pressure diffractometer SNAP (beamline 3) at the Spallation Neutron Source, USA

| Parameter (units)            | Fit result (deviation)            |
|------------------------------|-----------------------------------|
| <b>Formula</b>               | H <sub>2</sub> · H <sub>2</sub> O |
| <b>Space Group</b>           | <i>Fd<math>\bar{3}m</math></i>    |
| <b>Temperature</b>           | 90(1) K                           |
| <b>Pressure</b>              | 3.6(1) GPa                        |
| <b>Lattice Parameter (Å)</b> | <i>a</i> = 6.402(5)               |
| <b>Radiation</b>             | Spallation Neutrons               |
| <b>Diffractometer</b>        | SNAP (BL-3), SNS, ORNL            |
| <b>R<sub>w</sub> (%)</b>     | 1.68                              |
| <b>χ<sup>2</sup></b>         | 0.92                              |
